# Supplementary material
Source: Springer Nature journal article supplement (https://www.springermedizin.de/resource/supplementary/12913_2006_493_MOESM2_ESM.pdf/9534868)
Supplement: MOESM2 [file 9534868]

| Condition                                  | Pneumonia                                         | Diarrhoea                           | HIV/AIDS                                      | HIV/AIDS                                | HIV transmission from mother to child       | Tuberculosis + HIV   | Tuberculosis                   | Malaria                                         | Malaria                                                            |
|--------------------------------------------|---------------------------------------------------|-------------------------------------|-----------------------------------------------|-----------------------------------------|---------------------------------------------|----------------------|--------------------------------|-------------------------------------------------|--------------------------------------------------------------------|
| Intervention                               | Integrated Management of Childhood Illness (IMCI) | Safe water (software)               | Highly active anti-retroviral therapy (HAART) | Voluntary Counselling and Testing (VCT) | Single dose Nevirapine (targeted treatment) | Community based DOTs | Community based DOTs           | Intermittent treatment of pregnant mothers      | Impregnated bed nets                                               |
| <b>Prevalence (%)</b>                      | <b>14</b>                                         | <b>12</b>                           | <b>32.1 *</b><br><b>4.0 **</b>                | <b>32.1 *</b><br><b>4.0 **</b>          | <b>13.7</b>                                 | <b>44 ***</b>        | <b>0.4</b>                     | <b>9.4</b>                                      | <b>30.9 - 55.4</b>                                                 |
| Burden of disease#<br><b>Dar es Salaam</b> | <b>5.1</b>                                        | <b>0.9</b>                          | <b>13.5</b>                                   | <b>13.5</b>                             | <b>1.4</b>                                  | <b>17.6</b>          | <b>3.9</b>                     | <b>2.9</b>                                      | <b>7.9</b>                                                         |
| <b>Coverage (%) – expert estimates</b>     | <b>37</b>                                         | <b>40-50</b>                        | <b>&lt; 1</b>                                 | <b>&lt; 5</b>                           | <b>2</b>                                    | <b>100</b>           | <b>100</b>                     | <b>30</b>                                       | <b>12</b>                                                          |
| Data Sources                               | National Bureau of Statistics, 1999               | National Bureau of Statistics, 1999 | National AIDS Control Programme, 2000         | National AIDS Control Programme, 2000   | Kilewo 2001<br>Kwesigabo 2000               | Range 2001           | Global TB Programme, WHO, 2002 | Mnyika, 2000<br>Malaria Control Programme, 2002 | Drakeley 2000<br>Wakibara, 1997<br>Malaria Control Programme, 2002 |

\* = Urban, Iringa; \*\* = Rural, Mwanza; \*\*\* = Percentage of TB-patients with HIV; # = MoH/AMMP data
